# Supplementary material for: SARS-CoV-2 Gut-Targeted Epitopes: Sequence Similarity and Cross-Reactivity Join Together for Molecular Mimicry
Source: MDPI journal article supplement (doi:10.3390/biomedicines11071937), 2023-07-07
Supplement: s1 [file s1]

**Table S1: Sequence similarity between additional SARS-CoV-2 proteins and enteric self-antigens related to ADs**

| Human Protein<br>(Autoimmune-related<br>Disease) <sup>1</sup>                                                                  | SARS-CoV-2<br>Protein | Human<br>VS<br>SARS-CoV-2 | Ln | Identity<br>% | Similarity<br>% | Score <sup>2</sup> |
|--------------------------------------------------------------------------------------------------------------------------------|-----------------------|---------------------------|----|---------------|-----------------|--------------------|
| Cytochrome P450 2D6<br>(AIH, CD)                                                                                               | ORF1ab<br>polyprotein | AFLPFSAG                  | 8  | 75            | 87.5            | 33                 |
|                                                                                                                                |                       | AFLPFAMG                  |    |               |                 |                    |
| Myosin-11<br>(AIH)                                                                                                             | ORF1ab<br>polyprotein | ASSDKFVA                  | 8  | 75            | 75              | 24                 |
|                                                                                                                                |                       | AGSDKGVA                  |    |               |                 |                    |
|                                                                                                                                | ORF1ab<br>polyprotein | LEEEEAAR                  | 8  | 75            | 75              | 24                 |
|                                                                                                                                |                       | LNLEEAAR                  |    |               |                 |                    |
|                                                                                                                                | ORF1ab<br>polyprotein | PKGFMDGK                  | 8  | 75            | 75              | 30                 |
|                                                                                                                                |                       | PKGFCDLK                  |    |               |                 |                    |
|                                                                                                                                | ORF1ab<br>polyprotein | KQKDKKLK                  | 8  | 75            | 87.5            | 32                 |
|                                                                                                                                |                       | KQDDKKIK                  |    |               |                 |                    |
| Dihydrolipoyllysine-<br>residue acetyltransferase<br>component of pyruvate<br>dehydrogenase<br>complex, mitochondrial<br>(PBC) | ORF1ab<br>polyprotein | LVPADNEK                  | 8  | 75            | 75              | 28                 |
|                                                                                                                                |                       | LVPGFNEK                  |    |               |                 |                    |
| Small nuclear<br>ribonucleoprotein Sm<br>D1 (PBC)                                                                              | ORF1ab<br>polyprotein | LPLDTLLVD                 | 9  | 77.8          | 77.8            | 32                 |
|                                                                                                                                |                       | LPTGTLLVD                 |    |               |                 |                    |
| Protein-glutamine<br>gamma-<br>glutamyltransferase 2<br>(CD)                                                                   | ORF8 protein          | QPQPFVVD                  | 8  | 75            | 87.5            | 32                 |
|                                                                                                                                |                       | QHQPYYVD                  |    |               |                 |                    |
|                                                                                                                                | ORF1ab<br>polyprotein | PFPASTGY                  | 8  | 75            | 75              | 33                 |
|                                                                                                                                |                       | PFVVSTGY                  |    |               |                 |                    |
|                                                                                                                                | ORF1ab<br>polyprotein | QPEEQPT                   | 7  | 85.7          | 85.7            | 31                 |
|                                                                                                                                |                       | QPLEQPT                   |    |               |                 |                    |
|                                                                                                                                | ORF1ab<br>polyprotein | EQKTVEIP                  | 8  | 75            | 75              | 30                 |
|                                                                                                                                |                       | EQKIAEIP                  |    |               |                 |                    |
|                                                                                                                                | ORF1ab<br>polyprotein | LLNLNLP                   | 7  | 85.7          | 85.7            | 29                 |
|                                                                                                                                |                       | LSNLNLP                   |    |               |                 |                    |
| Matrin-3<br>(AIH)                                                                                                              | ORF1ab<br>polyprotein | FDSEYERMG                 | 9  | 77.8          | 77.8            | 33                 |
|                                                                                                                                |                       | FDSEYCRHG                 |    |               |                 |                    |
|                                                                                                                                | ORF1ab<br>polyprotein | QKLKKFLN                  | 8  | 75            | 87.5            | 28                 |
|                                                                                                                                |                       | KKLKKS LN                 |    |               |                 |                    |
|                                                                                                                                | ORF1ab<br>polyprotein | KVDKIEEL                  | 8  | 75            | 75              | 25                 |
|                                                                                                                                |                       | KAYKIEEL                  |    |               |                 |                    |
|                                                                                                                                | ORF1ab<br>polyprotein | IATGGAVF                  | 8  | 75            | 75              | 28                 |
|                                                                                                                                |                       | IAFGGCVF                  |    |               |                 |                    |
| Formimidoyltransferase-<br>cyclodeaminase (AIH)                                                                                | ORF8 protein          | VGARSAAP                  | 8  | 75            | 87.5            | 31                 |
|                                                                                                                                |                       | VGARKSAP                  |    |               |                 |                    |
| Lipoamide<br>acyltransferase<br>component of branched-<br>chain alpha-keto acid                                                | ORF1ab<br>polyprotein | PPKPKDMT                  | 8  | 75            | 75              | 30                 |
|                                                                                                                                |                       | PGIPKDMT                  |    |               |                 |                    |
|                                                                                                                                | Spike<br>glycoprotein | IDLTELVK                  | 8  | 75            | 75              | 24                 |

|                                                                                                                        |                             |            |    |      |      |    |
|------------------------------------------------------------------------------------------------------------------------|-----------------------------|------------|----|------|------|----|
| dehydrogenase complex, mitochondrial (AIH)                                                                             |                             | IDLQELGK   |    |      |      |    |
| E3 ubiquitin-protein ligase TRIM21 (AIH)                                                                               | ORF1ab polyprotein          | KLEVEIAI   | 8  | 75   | 75   | 24 |
|                                                                                                                        |                             | KLNEEIAI   |    |      |      |    |
|                                                                                                                        | ORF1ab polyprotein          | LDPDTANP   | 8  | 75   | 75   | 29 |
|                                                                                                                        |                             | LKVDTANP   |    |      |      |    |
|                                                                                                                        | Spike glycoprotein          | PRRQASSA   | 8  | 75   | 75   | 26 |
|                                                                                                                        |                             | PRRAASVA   |    |      |      |    |
|                                                                                                                        | nucleocapsid phosphoprotein | QSGERSG    | 7  | 85.7 | 100  | 32 |
|                                                                                                                        |                             | QNGERSG    |    |      |      |    |
| Protein disulfide-isomerase A3 (AIH)                                                                                   | ORF3a protein               | LFPGVALL   | 8  | 75   | 75   | 24 |
|                                                                                                                        |                             | LIVGVALL   |    |      |      |    |
|                                                                                                                        | Nucleocapsid phosphoprotein | EEKPKKKKKA | 10 | 70   | 70   | 31 |
|                                                                                                                        |                             | EPKKDKKKKA |    |      |      |    |
| Dihydrolipoyllysine-residue succinyltransferase component of 2-oxoglutarate dehydrogenase complex, mitochondrial (AIH) | Spike glycoprotein          | IDDTTKEV   | 8  | 75   | 75   | 28 |
|                                                                                                                        |                             | IDDTTDAV   |    |      |      |    |
| Smoothelin (AIH)                                                                                                       | ORF1ab polyprotein          | AIRRVRA    | 7  | 85.7 | 85.7 | 26 |
|                                                                                                                        |                             | AIRHVRA    |    |      |      |    |
|                                                                                                                        | ORF1ab polyprotein          | EKLEKEGA   | 8  | 75   | 75   | 28 |
|                                                                                                                        |                             | ENLTKEGA   |    |      |      |    |
| O-phosphoseryl-tRNA(Sec) selenium transferase (AIH,PBC)                                                                | ORF1ab polyprotein          | TDLKAVEA   | 8  | 75   | 75   | 26 |
|                                                                                                                        |                             | TTLKGVEA   |    |      |      |    |
|                                                                                                                        | ORF1ab polyprotein          | GDELRTD    | 7  | 85.7 | 85.7 | 30 |
|                                                                                                                        |                             | GDELGTD    |    |      |      |    |
| Nuclear pore membrane glycoprotein 210 (PBC)                                                                           | Spike glycoprotein          | FHAHSSVLN  | 9  | 77.8 | 77.8 | 27 |
|                                                                                                                        |                             | FGAISSVLN  |    |      |      |    |
|                                                                                                                        | ORF3a protein               | AASPIITL   | 8  | 75   | 87.5 | 25 |
|                                                                                                                        |                             | SASKIITL   |    |      |      |    |
|                                                                                                                        | nucleocapsid phosphoprotein | KGFLASGS   | 8  | 75   | 75   | 30 |
|                                                                                                                        |                             | KGFYAEGS   |    |      |      |    |
|                                                                                                                        | ORF1ab polyprotein          | LATVLTSL   | 8  | 75   | 87.5 | 28 |
|                                                                                                                        |                             | LLTILTSL   |    |      |      |    |
|                                                                                                                        | ORF1ab polyprotein          | LVAVPLG    | 7  | 85.7 | 85.7 | 28 |
|                                                                                                                        |                             | LVAVPTG    |    |      |      |    |
|                                                                                                                        | ORF1ab polyprotein          | DESGQKKL   | 8  | 75   | 87.5 | 29 |
|                                                                                                                        |                             | DESGEFKL   |    |      |      |    |
| Cytoskeleton-associated protein 5 (IBD)                                                                                | ORF1ab polyprotein          | LVKALKKV   | 8  | 75   | 87.5 | 28 |
|                                                                                                                        |                             | LAKALRKV   |    |      |      |    |
|                                                                                                                        | ORF1ab polyprotein          | VLGDSKNN   | 8  | 75   | 75   | 28 |
|                                                                                                                        |                             | VTGDSCNN   |    |      |      |    |
|                                                                                                                        | ORF1ab                      | KAVNPFLA   | 8  | 75   | 75   | 27 |

|                                                        |                       |          |   |      |      |    |
|--------------------------------------------------------|-----------------------|----------|---|------|------|----|
|                                                        | polyprotein           | KLVNKFLA |   |      |      |    |
| Noggin (UC)                                            | ORF1ab                | DLNETLL  | 7 | 85.7 | 100  | 31 |
|                                                        | polyprotein           | DLNETLV  |   |      |      |    |
| Sucrase-isomaltase,<br>intestinal<br>(Crohn's disease) | Spike<br>glycoprotein | PNKRSFI  | 7 | 85.7 | 100  | 32 |
|                                                        |                       | PSKRSFI  |   |      |      |    |
|                                                        | ORF1ab<br>polyprotein | LAFQTVK  | 7 | 85.7 | 100  | 30 |
|                                                        |                       | VAFQTVK  |   |      |      |    |
|                                                        | ORF1ab<br>polyprotein | TSIGPLV  | 7 | 85.7 | 85.7 | 30 |
|                                                        |                       | TSFGPLV  |   |      |      |    |
|                                                        | ORF1ab<br>polyprotein | YVILDPA  | 8 | 75   | 75   | 27 |
|                                                        |                       | YVYIGDPA |   |      |      |    |

<sup>1</sup>Human proteins that are implicated in enteric autoimmune diseases: autoimmune hepatitis (AIH), celiac disease (CD), primary biliary cholangitis (PBC), ulcerative colitis (UC), and inflammatory bowel disease (IBD).

<sup>2</sup>**Score** is based on BLOSUM62 substitution matrix between amino acids.

**Table S2: The functionality of additional enteric antigens and their corresponding similar sequences**

| Shared Peptides                                                    | Enteric protein and potential function/pathogenesis                                                                                                                                                                                                                                                                                                          | AD <sup>1</sup> | Ref           |
|--------------------------------------------------------------------|--------------------------------------------------------------------------------------------------------------------------------------------------------------------------------------------------------------------------------------------------------------------------------------------------------------------------------------------------------------|-----------------|---------------|
| AFLPFSAG                                                           | <b>Cytochrome P450 2D6 (CYP2D6, UniProt:P10635)</b><br>Has been recognized as the major autoantigen in type 2 AIH. In patients with AIH-2, the target for anti-LKM-1 antibodies has been identified as the 2D6 isoform of the large cytochrome P450 enzyme family.                                                                                           |                 | [62–65]       |
| ASSDKFVA<br>LEEEEAAR<br>PKGFMGDK<br>KQKDKKLLK                      | <b>Myosin-11 (SMMHC, UniProt:P35749)</b><br>Autoantibodies to non-muscle myosin heavy chain were reported in patients with chronic liver diseases. Patients presenting with ANA and/or smooth muscle antibodies (SMA), account for about 80% of cases of AIH.                                                                                                | AIH             | [68,69]       |
| LVPADNEK                                                           | <b>Dihydrolipoyllysine-residue acetyltransferase component of pyruvate dehydrogenase complex, mitochondrial (PDC-E2, UniProt:P10515)</b><br>PBC patients have been characterized to have autoreactive T-cell and B-cell responses directed at self-PDC-E2. The diagnosis of PBC is readily reached by the detection of specific AMA directed against PDH-E2. | PBC             | [73,74]       |
| LPLDTLLVD                                                          | <b>Small nuclear ribonucleoprotein SmD1 (SmD1, UniProt:P62314)</b><br>This protein autoantigen falls into the classical autoantibody categories of autoimmune liver diseases: ANA (anti-nuclear autoantibodies), SMA (anti-smooth muscle autoantibodies), AMA, and LKM (liver-kidney microsomal autoantigens)..                                              | AIH<br>PBC      | [148]         |
| QPQPFVVD<br>PFPASTGY<br>QPPEQPT<br>EQKTVEIP<br>LLNLNLP<br>RNYEASVD | <b>Protein-glutamine gamma-glutamyltransferase 2 (TG2, UniProt:P21980)</b><br>TG2 is a ubiquitous enzyme that physiologically exerts multiple functions, mostly linked to matrix assembly and tissue repair. It is considered as the autoantigen in CD and the anti-TG2 autoantibodies are the prime serological marker of CD.                               | CD              | [25,149]      |
| FDSEYERMG<br>QKLKKFLN<br>KVDKIEEL<br>IATGGAVF                      | <b>Matrin-3 (UniProt: P43243)</b><br>A major protein that makes up the fibrogranular network of the nuclear matrix. Used as a diagnostic and prognostic marker in hepatic tumor progression.                                                                                                                                                                 | AIH             | [150]         |
| VGARSAAP                                                           | <b>Formimidoyltransferase-cyclodeaminase (FTCD, UniProt:O95954)</b><br>This enzyme is a liver-specific antigen recognized by the sera of patients with autoimmune hepatitis.                                                                                                                                                                                 | AIH             | [151]         |
| PPKPKDMT<br>IDLTELVK                                               | <b>Lipoamide acyltransferase component of branched-chain alpha-keto acid dehydrogenase complex, mitochondrial (BCOADC-E2, UniProt:P11182)</b><br>A 52 kDa mitochondrial autoantigen has been identified as the E2 subunit of the 2-oxo-acid dehydrogenase complex in PBC diagnosis.                                                                          | PBC             | [74,152]      |
| KLEVEIAI<br>LDPDTANP<br>PRRQASSA<br>QSGERSG<br>GRSGTSG             | <b>E3 ubiquitin-protein ligase TRIM21 (52 kDa Ro, UniProt:P19474)</b><br>Patients with AIH frequently express autoantibodies against soluble liver antigen/liver pancreas (anti-SLA/LP) and/or against 52 kDa Ro protein (anti-Ro52).                                                                                                                        | AIH             | [153–155]     |
| LFPGVALL<br>EEKPKKKKKA                                             | <b>Protein disulfide-isomerase A3 (ERp57, UniProt:P30101)</b><br>Antibodies against epitopes of ERp57 were detected in Liver kidney microsomal antibody type 1 positive sera in AIH patients.                                                                                                                                                                | AIH             | [156]         |
| IDDTTKEV                                                           | <b>Dihydrolipoyllysine-residue succinyltransferase component of 2-oxoglutarate dehydrogenase complex, mitochondrial (OGDC-E2, UniProt: P36957)</b><br>Associated with several ADs                                                                                                                                                                            | AIH<br>PBC      | [152,157,158] |
| AIRRVRA<br>EKLEKEGA                                                | <b>Smoothelin (UniProt:P53814)</b><br>A structural protein that is found exclusively in contractile smooth muscle cells. Part of the anti-smooth muscle antibodies in AIH.                                                                                                                                                                                   | AIH             | [150,159]     |

|                                                                      |                                                                                                                                                                                                                                                                                                                                 |                    |           |
|----------------------------------------------------------------------|---------------------------------------------------------------------------------------------------------------------------------------------------------------------------------------------------------------------------------------------------------------------------------------------------------------------------------|--------------------|-----------|
| TDLKAVEA<br>GDELRTD                                                  | <b>O-phosphoseryl-tRNA(Sec) selenium transferase (SLA, UniProt:Q9HD40)</b><br>Anti-SLA autoantibodies test is a diagnostic marker for HIA in patients who are negative for other autoantibodies and may otherwise be misdiagnosed. In AIH, the presence of anti-SLA autoantibodies is associated with reduced overall survival. | <b>AIH<br/>PBC</b> | [160,161] |
| FHAHSSVLN<br>AASPIITL<br>KGFLASGS<br>LATVLTSL<br>LVAVPLG<br>DESGQKKL | <b>Nuclear pore membrane glycoprotein 210 (gp210, UniProt:Q8TEM1)</b><br>Anti-nuclear envelope-gp210 antibodies are specifically detected in 20-30% of PBC patients; the presence of anti-gp210 antibodies predicts a more severe disease course.                                                                               | <b>PBC</b>         | [162,163] |
| LVKALKKV<br>VLGDSKNN<br>KAVNPFLA                                     | <b>Cytoskeleton-associated protein 5 (Ch-TOG, UniProt:Q14008)</b><br>Involved in cell division, and tight junctional functional integrity. Suggested to have a role in IBD pathogenesis and colorectal cancer spreading in Crohn's disease.                                                                                     | <b>IBD</b>         | [137,164] |
| DLNETLL                                                              | <b>Noggin (NOG, UniProt:Q13253)</b><br>Essential for cartilage morphogenesis and joint formation. Involved in the arthropathy in Crohn's disease.                                                                                                                                                                               | <b>IBD</b>         | [165]     |
| PNKRSFI<br>LAFQTVK<br>TSIGPLV<br>YVIILDPA                            | <b>Sucrase-isomaltase, intestinal (SI, UniProt:P14410)</b><br>A marked specific decrease in sucrase-isomaltase gene expression in villous enterocytes in acutely inflamed Crohn's ileum as compared to adjacent uninflamed ileum and normal ileum was reported.                                                                 | <b>IBD</b>         | [166]     |

<sup>1</sup> Autoimmune diseases: autoimmune hepatitis (AIH), celiac disease (CD), primary biliary cholangitis (PBC), and inflammatory bowel disease (IBD - including ulcerative colitis and Crohn's disease).

**Table S3: Additional similar epitopes' sequence with immunoreactive validation in experimental assays in IEDB**

| Human Epitope           | SARS-CoV-2 Epitope | Human vs SARS-CoV-2    | IEDB Human Assays' References                  | IEDB SARS-CoV-2 Assays' References         |
|-------------------------|--------------------|------------------------|------------------------------------------------|--------------------------------------------|
| GHFVKPEAFLPFSAGRRACL    | LYENAFLPFAMG       | AFLPFSAG<br>AFLPFAMG   | Tcell [76]                                     | Bcell(IgM) [82]                            |
| NASSDKFVADL             | HFGAGSDKGVAPGTA    | ASSDKFVA<br>AGSDKGVA   | HLA-I [93];<br>HLA-II [90]                     | Bcell(IgM) [82]                            |
| DLEEQLLEEEAARQKLQLEKVT  | THGLNLEEAARYMRS    | LEEEEAAR<br>LNLEEAAR   | HLA-II [93]                                    | Bcell(IgM) [82]                            |
| NAIPKGFMDGKQA           | IDHPNPKGFCDLK GK   | PKGFMDGK<br>PKGFCDLK   | HLA-II [93]                                    | Bcell(IgA) [78]                            |
| SLKQKDKKLKE             | RKQDDKKIKACV       | KQKDKKLK<br>KQDDKKIK   | HLA-II [93]                                    | Bcell(IgM) [82]                            |
| ILAIGASEDKLVPADNEKGFDVA | LVPGFNEKTHVQLSL    | LVPADNEK<br>LVPGFNEK   | HLA-II [93]                                    | Bcell(IgA) [78]                            |
| FILPDSLPLDTLLVDVEPK     | RQWLPTGTLLVDS DL   | LPLDTLLVD<br>LPTGTLLVD | HLA-I;<br>HLA-II [167]                         | Bcell(IgA) [78]                            |
| EQQPQFVVDWIQ            | TQHQPYYVDDPCPIH    | QPQPFVVD<br>QHQPYYVD   | Bcell(IgA) [168]                               | DRB1*15:01;Tcell [77];<br>Bcell(IgG) [169] |
| QPEPFPASTGYQ            | DGVPFVVSTGYHFRE    | PFPASTGY<br>PFVVSTGY   | Bcell(IgA) [168]                               | Bcell(IgA) [78]                            |
| QP EEQPTVS YNG          | DLQPLEQPTSEA       | QPEEQPT<br>QPLEQPT     | Bcell(IgA) [168]                               | Bcell(IgM) [82]                            |
| TEEQKTVEIP              | VEQKIAEIPKEE       | EQKTVEIP<br>EQKIAEIP   | HLA-I [97];<br>DQA1*02:01/<br>DQB1*02:02 [170] | Bcell(IgM) [82]                            |
| PEQLNLNLPEQ             | FDTRVLSNLNLPGCD    | LLNLNL<br>LSNLNL       | Bcell(IgA) [168]                               | Bcell(IgM) [82]                            |
| LTLHFEGRNYEASVD         | MNSRNYIAQVDV       | RNYEASVD<br>RNYIAQVD   | Bcell(IgA) [171]                               | Bcell(IgM) [82]                            |
| HKFDSEYERMG             | TFDSEYCRHGT CER    | FDSEYERMG<br>FDSEYCRHG | HLA-I [83];<br>DRB1*04:05 [93]                 | Bcell(IgM) [82]                            |
| SLPHYQKLKKFLNKLAEERRQ   | EVVLKKLKKSLN VAK   | QKLKKFLN<br>KKLKKSLN   | HLA-II [93]                                    | Bcell(IgM) [82]                            |
| KLKKVDKIEEL             | SDKAYKIEELFY SYA   | KVDKIEEL               | A*02:02 [79];                                  | Bcell(IgA) [78]                            |

|                     |                  |            |                                                                                                                    |                                                  |
|---------------------|------------------|------------|--------------------------------------------------------------------------------------------------------------------|--------------------------------------------------|
|                     |                  | KAYKIEEL   | HLA-II [172]                                                                                                       |                                                  |
| AIATGGAVF           | IAFGGCVFSYVGCHN  | IATGGAVF   | C*12:02 [173];<br>DQA1*05:05/<br>DQB1*03:01 [170];<br>A*01:01 [174];<br>A*02:01 [175];<br>B*15:02 [96];<br>DQ [99] | Bcell(IgA) [78]                                  |
|                     |                  | IAFGGCVF   |                                                                                                                    |                                                  |
| RAFVGEVGARSAAPGGGSV | YIRVGARKSAPLIEL  | VGARSAAP   | HLA-II [176]                                                                                                       | Tcell [94];<br>Bcell(IgG) [169]                  |
|                     |                  | VGARKSAP   |                                                                                                                    |                                                  |
| VEIMPPPPKPKDMTPILV  | CVDIPGIPKDMTYRR  | PPKPKDMT   | HLA-II [90]                                                                                                        | Bcell(IgA) [78]                                  |
|                     |                  | PGIPKDMT   |                                                                                                                    |                                                  |
| IDLTELVKLREELKPIAF  | NLNESLIDLQELGKYE | IDLTELVK   | HLA-II [93]                                                                                                        | A*11:01 [91]                                     |
|                     |                  | IDLQELGK   |                                                                                                                    |                                                  |
| ELAEKLEVEIAIKRADWK  | KLNEEIAII        | KLEVEIAI   | Bcell(IgG) [153]                                                                                                   | A*02:01 [177];<br>Tcell [96];<br>Bcell(IgA) [78] |
|                     |                  | KLNEEIAI   |                                                                                                                    |                                                  |
| TLD PDTANPWLILSE    | LKVD TANPKTPKYKF | LDPDTANP   | Bcell(IgG) [178]                                                                                                   | Bcell(IgA) [78];<br>Tcell [94]                   |
|                     |                  | LKVDTANP   |                                                                                                                    |                                                  |
| GIPRRQASSAVR        | SPRRAASVASQ      | PRRQASSA   | Bcell(IgG) [179];<br>HLA-II [93]                                                                                   | HLA-II [95]                                      |
|                     |                  | PRRAASVA   |                                                                                                                    |                                                  |
| QQSGERSGRSGS        | SNQNGERSGARSKQR  | QSGERSG    | Bcell(IgG) [179]                                                                                                   | Tcell [88];<br>Bcell(IgA) [78]                   |
|                     |                  | QNGERSG    |                                                                                                                    |                                                  |
| ARGRSGETSGHS        | GIQYGRSGETLGVLV  | GRSGETSG   | Bcell(IgG) [179];<br>HLA-I [79]                                                                                    | Bcell(IgA) [78]                                  |
|                     |                  | GRSGETLG   |                                                                                                                    |                                                  |
| ALFPGVALL           | ASLPFGWLIVGVALL  | LFPGVALL   | A*02:01 [180];<br>B*27:05 [181];<br>HLA-I [182]                                                                    | Bcell(IgA) [78];<br>HLA [183]                    |
|                     |                  | LIVGVALL   |                                                                                                                    |                                                  |
| NPPVIQEEKPKKKKKAQE  | TEPKKDKKKKADETQ  | EEKPKKKKKA | DR [184];<br>DRB5*01:01 [185];<br>HLA-II [93]                                                                      | Tcell [88];<br>Bcell(IgG) [85]                   |
|                     |                  | EPKKDKKKKA |                                                                                                                    |                                                  |
| VIDDTTKEV           | RDIDDTTDAV       | IDDTTKEV   | HLA-I [186]                                                                                                        | A*02:01 [187]                                    |
|                     |                  | IDDTTDAV   |                                                                                                                    |                                                  |
| ERKLIRAAIRRVRAQE    | NMFITREEAIRHVRA  | AIRRVRA    | HLA-II [167]                                                                                                       | Tcell [94];<br>Bcell(IgA) [78]                   |
|                     |                  | AIRHVRA    |                                                                                                                    |                                                  |
| EKLEKEGAAGSPGGPR    | EFCGTENLTKEGATT  | EKLEKEGA   | DRB1*04:01                                                                                                         | Bcell(IgA) [78]                                  |

|                        |                        |           |                                                                                     |                                                    |
|------------------------|------------------------|-----------|-------------------------------------------------------------------------------------|----------------------------------------------------|
|                        |                        | ENLTKEGA  | [170];<br>HLA-II [93]                                                               |                                                    |
| ELRTDLKAVEAKVQELGPDC   | TTLKGVEAVMYMGTL        | TDLKAVEA  | Tcell [161]                                                                         | Bcell(IgA) [78]                                    |
|                        |                        | TTLKGVEA  |                                                                                     |                                                    |
| IENVLEGDELRTDLKAVEAK   | LGDELGTDPYEDFQ         | GDELRTD   | Tcell [161]                                                                         | Bcell(IgM) [82]                                    |
|                        |                        | GDELGTD   |                                                                                     |                                                    |
| VFHAHSSVLNF            | QLSSNFGAISSVLND        | FHAHSSVLN | HLA-I [188];<br>DQ [99]                                                             | HLA [95];<br>Tcell [189];<br>Bcell(IgA) [78]       |
|                        |                        | FGAISSVLN |                                                                                     |                                                    |
| AASPIITLV              | SASKIITLK              | AASPIITL  | HLA-I [188];<br>C*12:02 [173]                                                       | A*11:01 [190];<br>Tcell [191];<br>Bcell(IgM) [192] |
|                        |                        | SASKIITL  |                                                                                     |                                                    |
| HVDEKGFSLASGSMIGT      | QGTTLPKGfYAEGSR        | KGFLASGS  | HLA-II [176]                                                                        | Bcell(IgM) [89]                                    |
|                        |                        | KGfYAEGS  |                                                                                     |                                                    |
| LATVLTSL               | LLLILTSL               | LATVLTSL  | B*51:01 [193]                                                                       | A*02:01 [177]                                      |
|                        |                        | LLILTSL   |                                                                                     |                                                    |
| ALVAVPLGMTV            | FSTGVNLVAVPTGYV        | LVAVPLG   | A*02:01<br>[194]                                                                    | Bcell(IgA) [78]                                    |
|                        |                        | LVAVPTG   |                                                                                     |                                                    |
| DDESGQKKLHGLQAILV      | YLFDESGEFKL            | DESGQKKL  | DR [99];<br>B*07:02<br>[175];<br>HLA-II<br>[172];<br>DR1 [195];<br>A*01:01<br>[174] | HLA-I [83];<br>Tcell [196];<br>Bcell(IgM) [82]     |
|                        |                        | DESGEFKL  |                                                                                     |                                                    |
| DYADLVKALKKVVGKDTN     | MLAKALRKV              | LVKALKKV  | HLA-II [197]                                                                        | A*02:01; HLA<br>[177];<br>Bcell(IgA) [78]          |
|                        |                        | LAKALRKV  |                                                                                     |                                                    |
| TVLGDSKNNV             | EVTGDSCNNYMLTYN        | VLGDSKNN  | HLA-I [198]                                                                         | Tcell [77];<br>Bcell(IgA) [78]                     |
|                        |                        | VTGDSCNN  |                                                                                     |                                                    |
| VGEKAVNPFLADV DK       | KLVNKFLAL              | KAVNPFLA  | DPA1*02:01/<br>DPB1*01:01<br>[199]                                                  | Tcell [200]                                        |
|                        |                        | KLVNKFLA  |                                                                                     |                                                    |
| FDPKEKDLNETLLRSLG GHYD | NTLNDLNETLVT           | DLNETLL   | Bcell(IgG)<br>[165]                                                                 | Bcell(IgM) [82]                                    |
|                        |                        | DLNETLV   |                                                                                     |                                                    |
| FPNKRSFILTRSTFAGSG     | LPDPSKPSKRSFIEDLLFNKVT | PNKRSFI   | DRB1*07:01<br>[93]                                                                  | HLA [95];<br>Tcell [94];<br>Bcell(IgG) [85]        |
|                        |                        | PSKRSFI   |                                                                                     |                                                    |
| TTLAFQTVK              | AALTNNVAFQTVKPGN       | LAFQTVK   | A*11:01 [93]                                                                        | Bcell(IgG) [201]                                   |
|                        |                        | VAFQTVK   |                                                                                     |                                                    |



|                                   |                        |                 |                            |                                                   |
|-----------------------------------|------------------------|-----------------|----------------------------|---------------------------------------------------|
| VIRKSNGKTLFD <b>TSIGPL</b> VYSDQY | <b>TSFGPLVRK</b>       | <b>TSIGPLV</b>  | HLA-II [93]                | A*03:01 [190];<br>Tcell [191];<br>Bcell(IgA) [78] |
|                                   |                        | <b>TSFGPLV</b>  |                            |                                                   |
| <b>KYVIILDPAISIG</b>              | <b>AKHYVYIGDPAQLPA</b> | <b>YVIILDPA</b> | DRB1*13:03;<br>HLA-II [93] | Bcell(IgM) [202]                                  |
|                                   |                        | <b>YVYIGDPA</b> |                            |                                                   |
